# Supplementary material for: Environmentally benign antifouling potentials of triterpene-glycosides from Streptomyces fradiae: a mangrove isolate
Source: Royal Society of Chemistry journal article supplement (doi:10.1039/c4ra15335a), 2015-01-01

|                                                 |            |   |   |   |   |   |   |   |   |   |   |   |   |   |   |   |   |   |   |   |   |           |
|-------------------------------------------------|------------|---|---|---|---|---|---|---|---|---|---|---|---|---|---|---|---|---|---|---|---|-----------|
| <b>Methanol 100%</b>                            | <b>F31</b> | - | - | - | - | - | - | - | - | - | - | - | - | - | - | - | - | - | - | - | - | <b>EG</b> |
| <b>Methanol mild warmed 100%</b>                | <b>F32</b> | - | - | - | - | - | - | - | - | - | - | - | - | - | - | - | - | - | - | - | - | <b>EG</b> |
| <b>Control (Media + test bacterial strains)</b> |            | - | - | - | - | - | - | - | - | - | - | - | - | - | - | - | - | - | - | - | - | <b>EG</b> |

**EG: Excellent Growth; NG: No Growth; MG: Moderate Growth; Control: bacterial inoculum alone; ++: Highly growth inhibit; +: Less inhibit; - : More growth**

**Table S2. Antimicroalgal activity of individual column fractions against marine microalgal strains**

| Solvents                                                  | Fraction codes            | <i>Chaetoceros</i> sp |     | <i>Chlorella</i> sp. |     | <i>Nannochloropsis</i> sp. |     | <i>Dunaliella</i> sp. |     | <i>Tetraselmis</i> sp. |     | Remarks   |
|-----------------------------------------------------------|---------------------------|-----------------------|-----|----------------------|-----|----------------------------|-----|-----------------------|-----|------------------------|-----|-----------|
|                                                           |                           | 72h                   | 96h | 72h                  | 96h | 72h                        | 96h | 72h                   | 96h | 72h                    | 96h |           |
| <b>Hexane- 100%</b>                                       | <b>F1</b>                 | -                     | -   | -                    | -   | -                          | -   | -                     | -   | -                      | -   | <b>EG</b> |
| <b>Hexane to Benzene<br/>(90:10 to 10:90%)</b>            | <b>F2</b>                 | -                     | -   | -                    | -   | -                          | -   | -                     | -   | -                      | -   | <b>EG</b> |
|                                                           | <b>F3</b>                 | -                     | -   | -                    | -   | -                          | -   | -                     | -   | -                      | -   | <b>EG</b> |
|                                                           | <b>F4</b>                 | -                     | -   | -                    | -   | -                          | -   | -                     | -   | -                      | -   | <b>EG</b> |
|                                                           | <b>F5</b>                 | -                     | -   | -                    | -   | -                          | -   | -                     | -   | -                      | -   | <b>MG</b> |
|                                                           | <b>F6</b>                 | ++                    | ++  | ++                   | ++  | ++                         | ++  | ++                    | ++  | ++                     | ++  | <b>NG</b> |
|                                                           | <b>F7</b>                 | -                     | -   | -                    | -   | -                          | -   | -                     | -   | -                      | -   | <b>MG</b> |
|                                                           | <b>F8</b>                 | -                     | -   | -                    | -   | -                          | -   | -                     | -   | -                      | -   | <b>EG</b> |
|                                                           | <b>F9</b>                 | -                     | -   | -                    | -   | -                          | -   | -                     | -   | -                      | -   | <b>EG</b> |
|                                                           | <b>F10</b>                | -                     | -   | -                    | -   | -                          | -   | -                     | -   | -                      | -   | <b>EG</b> |
|                                                           | <b>Benzene- 100%</b>      | <b>F11</b>            | -   | -                    | -   | -                          | -   | -                     | -   | -                      | -   | -         |
| <b>Benzene to Ethyl<br/>acetate<br/>(90:10 to 10:90)</b>  | <b>F12</b>                | -                     | -   | -                    | -   | -                          | -   | -                     | -   | -                      | -   | <b>MG</b> |
|                                                           | <b>F13</b>                | -                     | -   | -                    | -   | -                          | -   | -                     | -   | -                      | -   | <b>EG</b> |
|                                                           | <b>F14</b>                | -                     | -   | -                    | -   | -                          | -   | -                     | -   | -                      | -   | <b>EG</b> |
|                                                           | <b>F15</b>                | -                     | -   | -                    | -   | -                          | -   | -                     | -   | -                      | -   | <b>MG</b> |
|                                                           | <b>F16</b>                | -                     | -   | -                    | -   | -                          | -   | -                     | -   | -                      | -   | <b>EG</b> |
|                                                           | <b>F17</b>                | -                     | -   | -                    | -   | -                          | -   | -                     | -   | -                      | -   | <b>EG</b> |
|                                                           | <b>F18</b>                | -                     | -   | -                    | -   | -                          | -   | -                     | -   | -                      | -   | <b>EG</b> |
|                                                           | <b>F19</b>                | -                     | -   | +                    | +   | +                          | +   | +                     | -   | -                      | -   | <b>MG</b> |
|                                                           | <b>F20</b>                | -                     | -   | -                    | -   | -                          | -   | -                     | -   | -                      | -   | <b>EG</b> |
|                                                           | <b>Ethyl acetate 100%</b> | <b>F21</b>            | -   | -                    | -   | -                          | -   | -                     | -   | -                      | -   | -         |
| <b>Ethyl acetate to<br/>Methanol<br/>(90:10 to 10:90)</b> | <b>F22</b>                | -                     | -   | -                    | -   | -                          | -   | -                     | -   | -                      | -   | <b>EG</b> |
|                                                           | <b>F23</b>                | -                     | -   | -                    | -   | +                          | +   | -                     | -   | -                      | -   | <b>MG</b> |
|                                                           | <b>F24</b>                | +                     | +   | +                    | +   | -                          | -   | -                     | -   | -                      | -   | <b>MG</b> |
|                                                           | <b>F25</b>                | ++                    | ++  | ++                   | ++  | ++                         | ++  | ++                    | ++  | ++                     | ++  | <b>NG</b> |
|                                                           | <b>F26</b>                | -                     | -   | -                    | -   | +                          | +   | +                     | -   | -                      | -   | <b>MG</b> |
|                                                           | <b>F27</b>                | -                     | -   | +                    | +   | +                          | +   | -                     | +   | -                      | -   | <b>MG</b> |
|                                                           | <b>F28</b>                | -                     | -   | -                    | -   | -                          | -   | -                     | -   | -                      | -   | <b>EG</b> |
|                                                           | <b>F29</b>                | -                     | -   | -                    | -   | -                          | -   | -                     | -   | -                      | -   | <b>EG</b> |
|                                                           | <b>F30</b>                | -                     | -   | -                    | -   | -                          | -   | -                     | -   | -                      | -   | <b>EG</b> |
|                                                           | <b>Methanol 100%</b>      | <b>F31</b>            | -   | -                    | -   | -                          | -   | -                     | -   | -                      | -   | -         |
| <b>Methanol mild warmed<br/>100%</b>                      | <b>F32</b>                | -                     | -   | -                    | -   | -                          | -   | -                     | -   | -                      | -   | <b>EG</b> |
| <b>Control (Media + test<br/>microalgal strains)</b>      |                           | -                     | -   | -                    | -   | -                          | -   | -                     | -   | -                      | -   | <b>EG</b> |

EG: Excellent Growth; NG: No Growth; MG: Moderate Growth; Control: Individual microalgal inoculum alone.

**Fig. S1.** Antibacterial properties of active Spot by TLC autobiography method

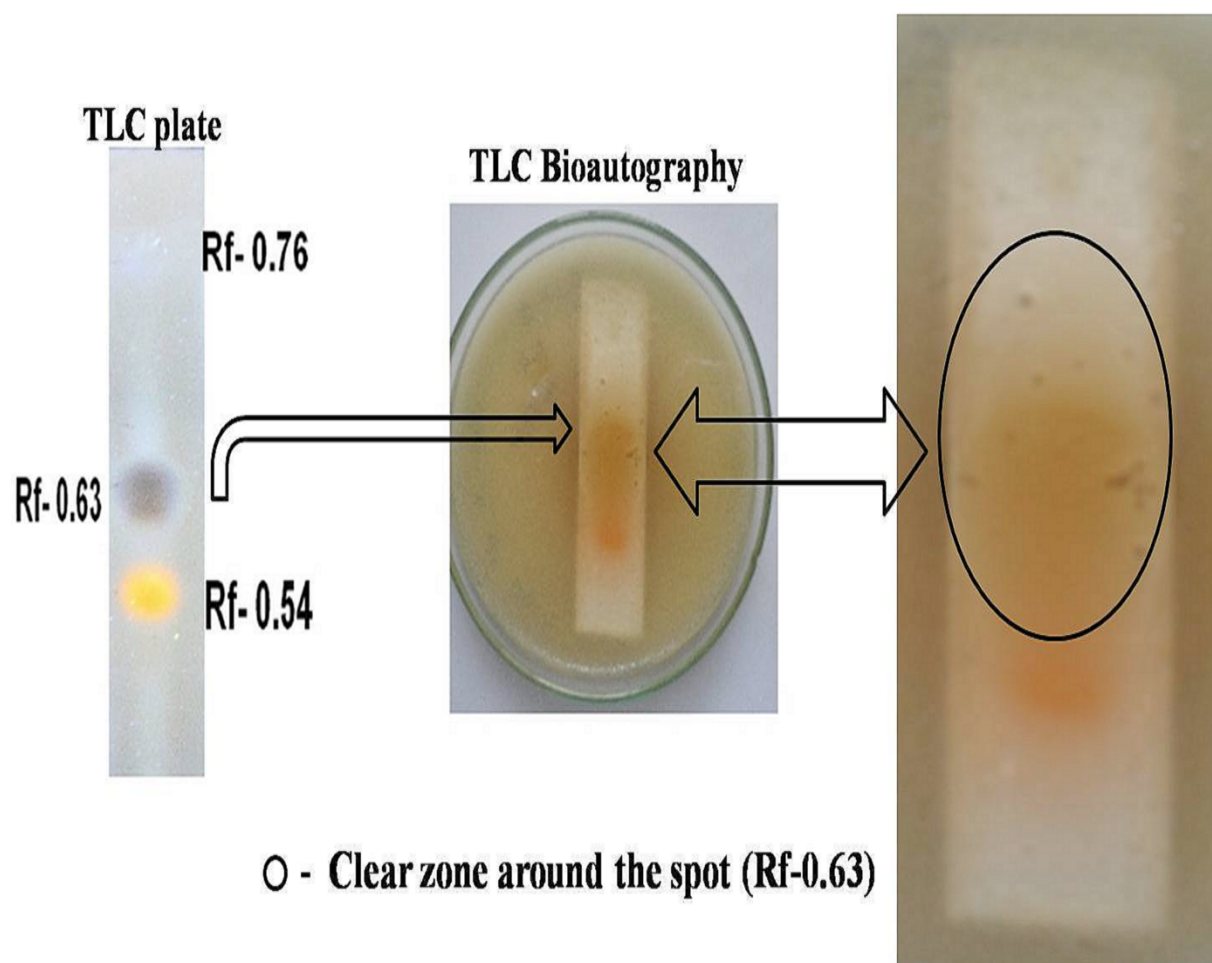

Fig. S1. FTIR analysis of bioassay guided fraction (24<sup>th</sup>) of *S. fradiae* RMS-MSU

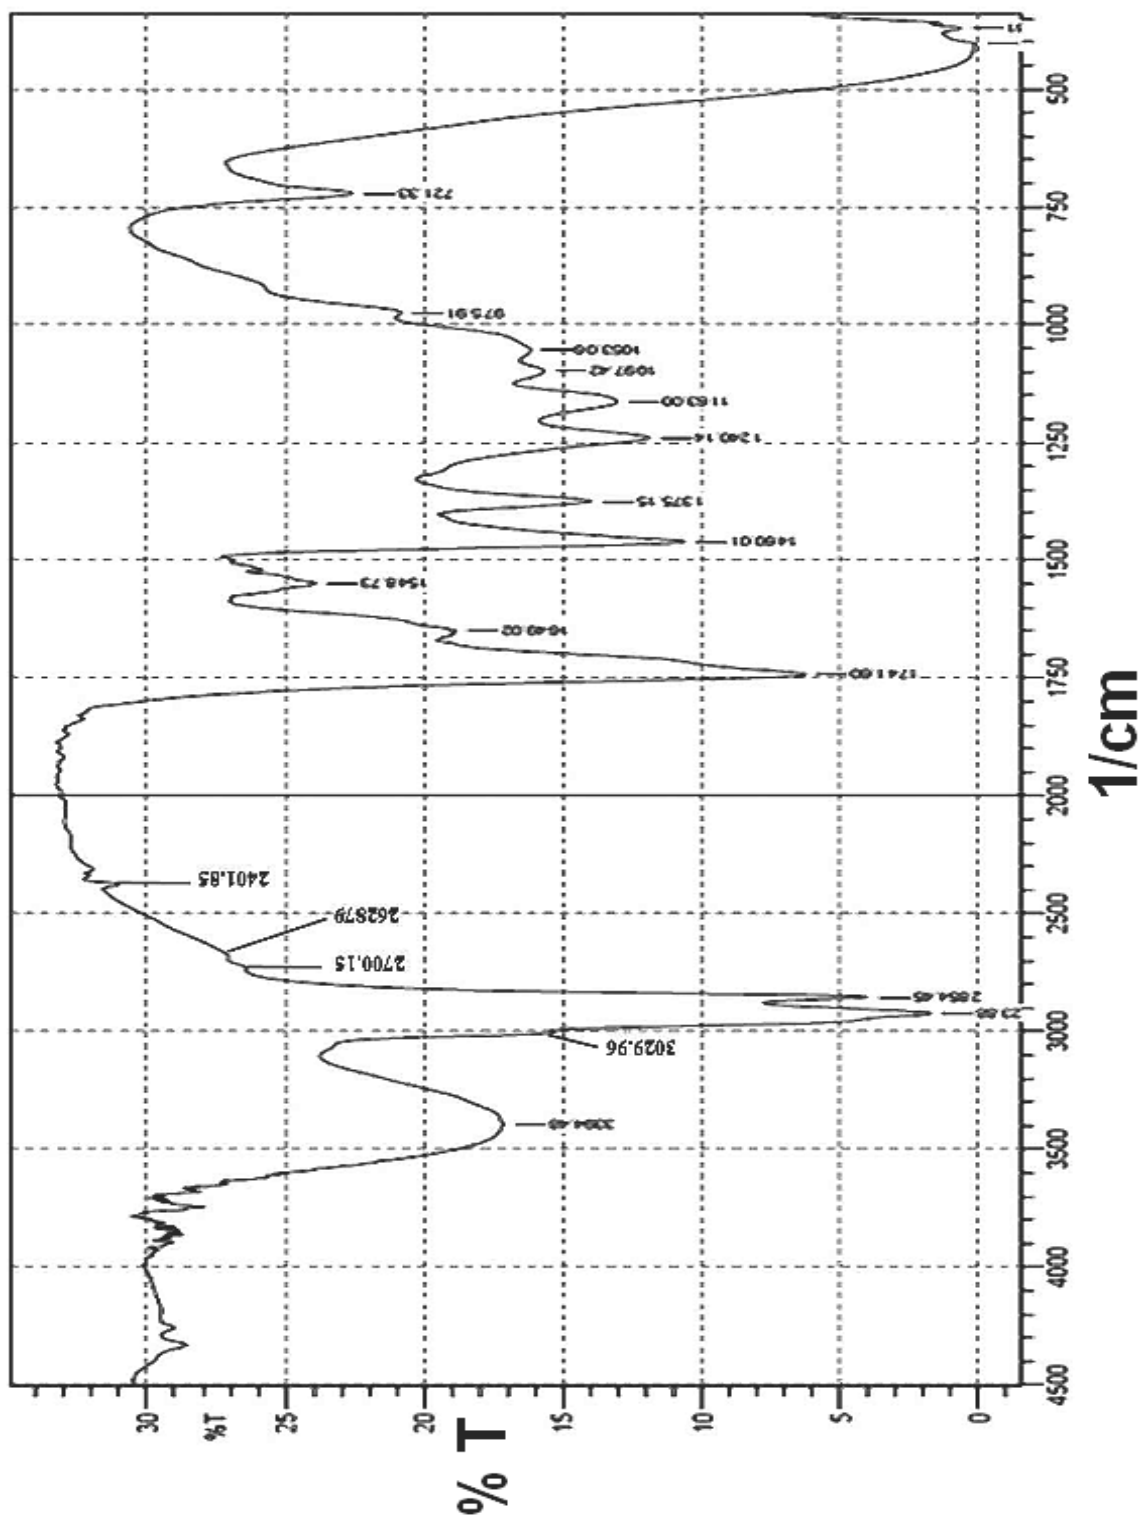

Supplement: c4ra15335a1.pdf [file c4ra15335a1.pdf]
